# Supplementary material for: Computational Modeling of Drug Delivery System Based on MOF-5 Metal- Organic Framework /Graphene Oxide Nanohybrid
Source: Research Square preprint supplement (doi:10.21203/rs.3.rs-6396496/v1), 2025-05-05
Supplement: Supplementary file 1 [file fd012bc65db555682162051d.docx]

**Supplementary:**

Computational Modeling of Drug Delivery System Based on MOF-5 Metal-Organic Framework /Graphene Oxide Nanohybrid

Marzieh Eskandarzadeha, Saeed Pourmandb, Sara Zareeic, Hamid Erfan-Niyab**,***, Sima Majidib

*a Research Committee of Faculty of Pharmacy, Lorestan University of Medical Science, Khorramabad, Iran*

*b* *Faculty of Chemical and Petroleum Engineering, University of Tabriz, 51666-16471 Tabriz, Iran;*

*c Department of Cell & Molecular Biology, Faculty of Biological Sciences, Kharazmi University, Tehran, Iran*

* Correspondence

E-mail address: herfan@tabrizu.ac.ir (H. Erfan-Niya)

Phone: +98 41 33392940

Fax: +98 41 33338497

**(a)**

**(b)**

**(c)**

**Figure S1.** Time evolutions of the density (left) and pressure (right) in (a) 5FU@MOF-5/GO, (b) DOX@MOF-5/GO and (c) DOX@CS@MOF-5/GO simulation systems, respectively.

**I**

**II**

**Figure S2.** Comparison of the radial distribution function (RDF) of DOX (I) and 5FU (II) drug molecules around the components of the designed MOF-5/GO nanocomposite vs. distance at the simulation systems.

**Figure S3.** Time evolutions of MSD of drug molecules at 5FU@MOF-5/GO and DOX@MOF-5/GO simulation systems.

**Figure S4.** The total intermolecular interaction energy (Einter) energy (left) and the number of atomic contacts (right) between chitosan polymer molecules and the components of MOF-5/GO nanocomposite during 60 ns time of simulation.

**Figure S5.** Time evolution of MSD for DOX molecule at DOX@CS@MOF-5/GO simulation system.
